# Supplementary material for: Medicinal Hypervalent Tellurium Prodrugs Bearing Different Ligands: A Comparative Study of the Chemical Profiles of AS101 and Its Halido Replaced Analogues
Source: MDPI journal article supplement (doi:10.3390/ijms23147505), 2022-07-06
Supplement: s1 [file s1]

# Medicinal Hypervalent Tellurium Prodrugs Bearing Different Ligands: A Comparative Study of the Chemical Profiles of AS101 and Its Halido Replaced Analogues

Lorenzo Chiaverini <sup>1,†</sup>, Damiano Cirri <sup>2,†</sup>, Iogann Tolbatov <sup>3,\*</sup>, Francesca Corsi <sup>1</sup>, Ilaria Piano <sup>1</sup>,  
Alessandro Marrone <sup>4</sup>, Alessandro Pratesi <sup>2</sup>, Tiziano Marzo <sup>1,\*</sup> and Diego La Mendola <sup>1</sup>

<sup>1</sup> Department of Pharmacy, University of Pisa, Via Bonanno Pisano, 6, 56126 Pisa, Italy;  
lorenzo.chiaverini@farm.unipi.it (L.C.); francesca.corsi@phd.unipi.it (F.C.);  
ilaria.piano@unipi.it (I.P.); diego.lamendola@unipi.it (D.L.M.)

<sup>2</sup> Department of Chemistry and Industrial Chemistry, University of Pisa, Via G. Moruzzi, 13,  
56124 Pisa, Italy; damiano.cirri@cci.unipi.it (D.C.); alessandro.pratesi@unipi.it (A.P.)

<sup>3</sup> Institute of Chemical Research of Catalonia (ICIQ), The Barcelona Institute of Science and  
Technology, 43007 Tarragona, Spain

<sup>4</sup> Dipartimento di Farmacia, Università degli Studi "G. D'Annunzio" Chieti-Pescara, Via dei  
Vestini, 66100 Chieti, Italy; amarrone@unich.it

\* Correspondence: tolbatov.i@gmail.com (I.T.); tiziano.marzo@unipi.it (T.M.)

† These authors contributed equally to this work.

## Contents

|                                         |    |
|-----------------------------------------|----|
| NMR spectra.....                        | 2  |
| IR spectra.....                         | 7  |
| Isolation of the oxidized species ..... | 10 |
| Computational studies.....              | 11 |
| Biological studies .....                | 12 |

## NMR spectra

General statement: NMR spectra have been recorded carefully using anhydrous DMSO. However, the residual presence of water partially affects the analysis and a partial conversion is detectable.

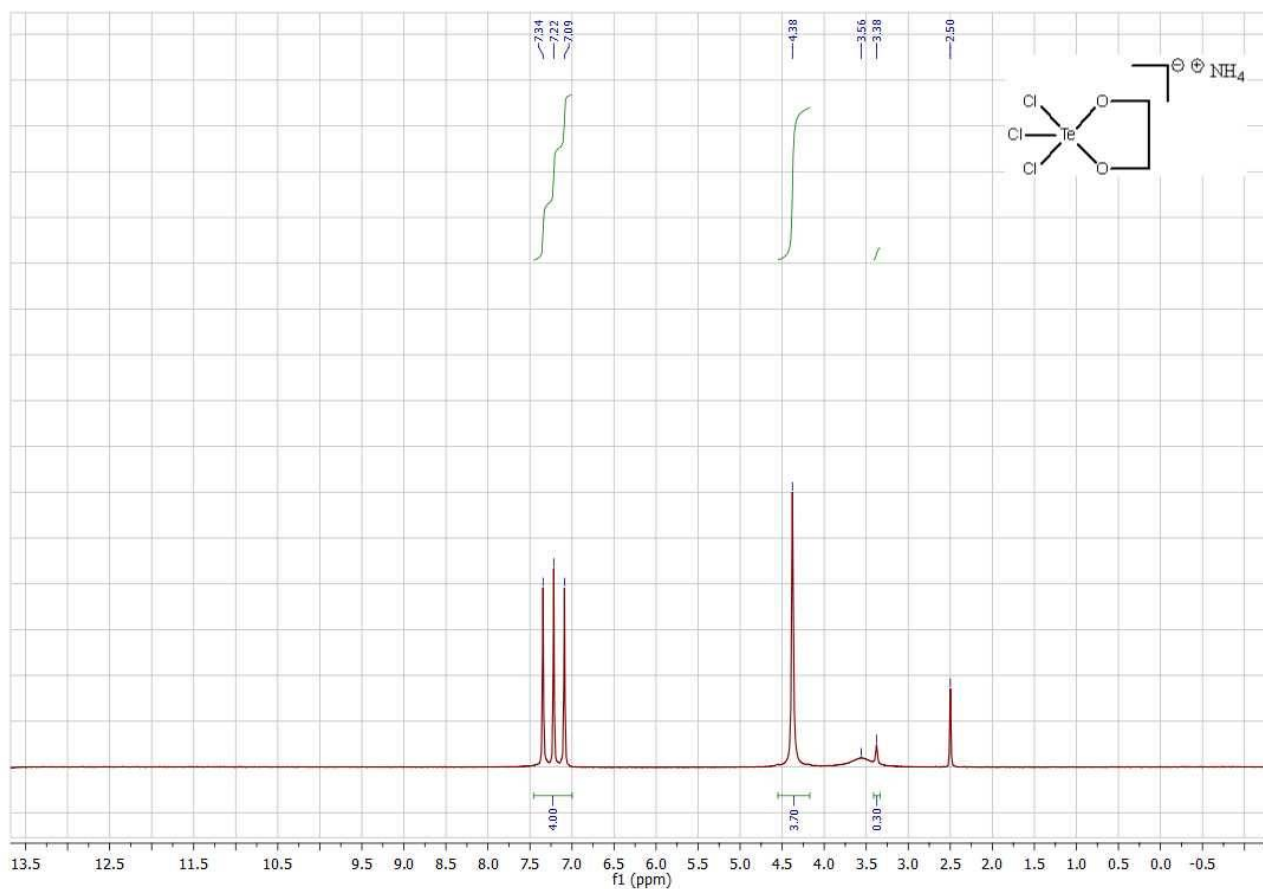

**Figure S1.**  $^1\text{H}$ NMR (400 MHz; DMSO- $d_6$ )  $\delta$ : 7.22 (4H;  $\text{NH}_4^+$ ); 4.38 (s; 4H;  $\text{CH}_2$ , coordinated ethylene glycol); 3.56 (br;  $\text{H}_2\text{O}$ ); 3.38 (s,  $\text{CH}_2$ , free ethylene glycol, due to partial degradation of complex owing to water in the organic solvent).

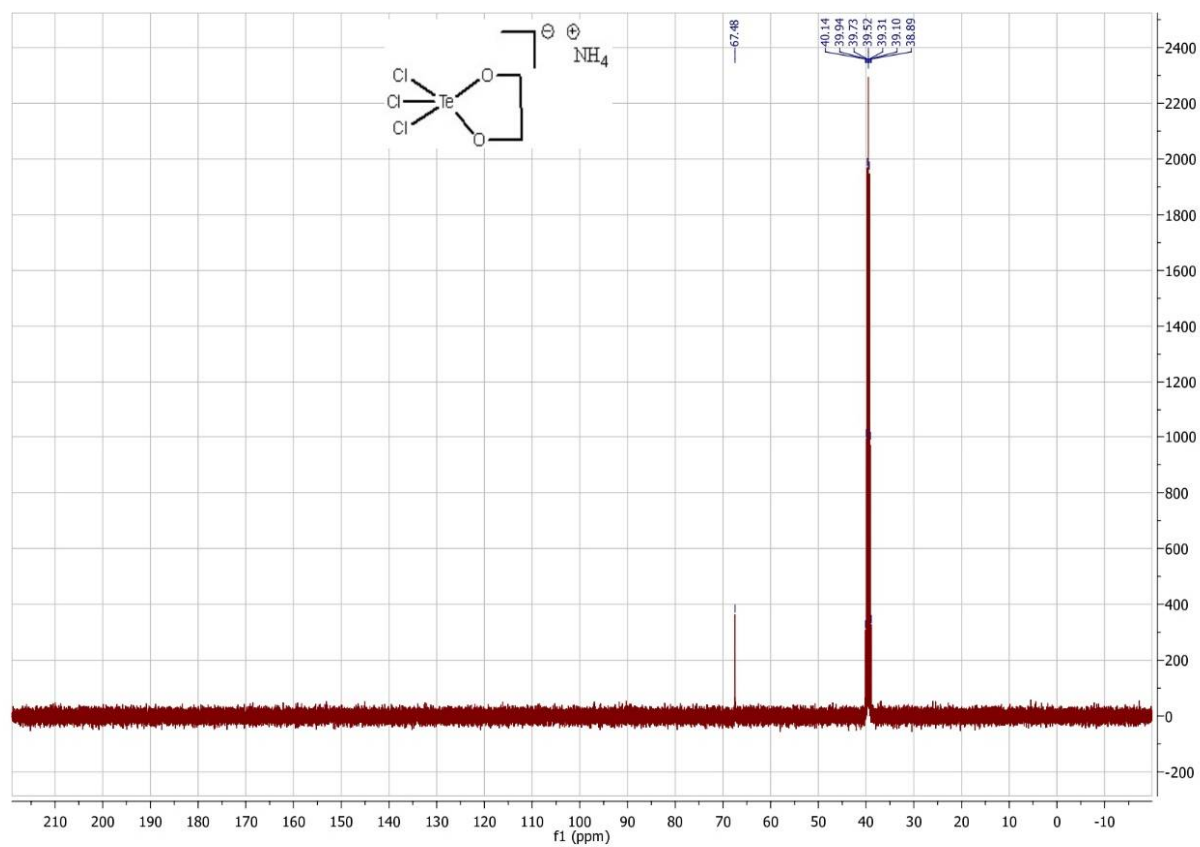

**Figure S2.**  $^{13}\text{C}\{^1\text{H}\}$ NMR (100 MHz; DMSO- $\text{d}_6$ )  $\delta$ : 67.48 ( $\text{CH}_2$ )

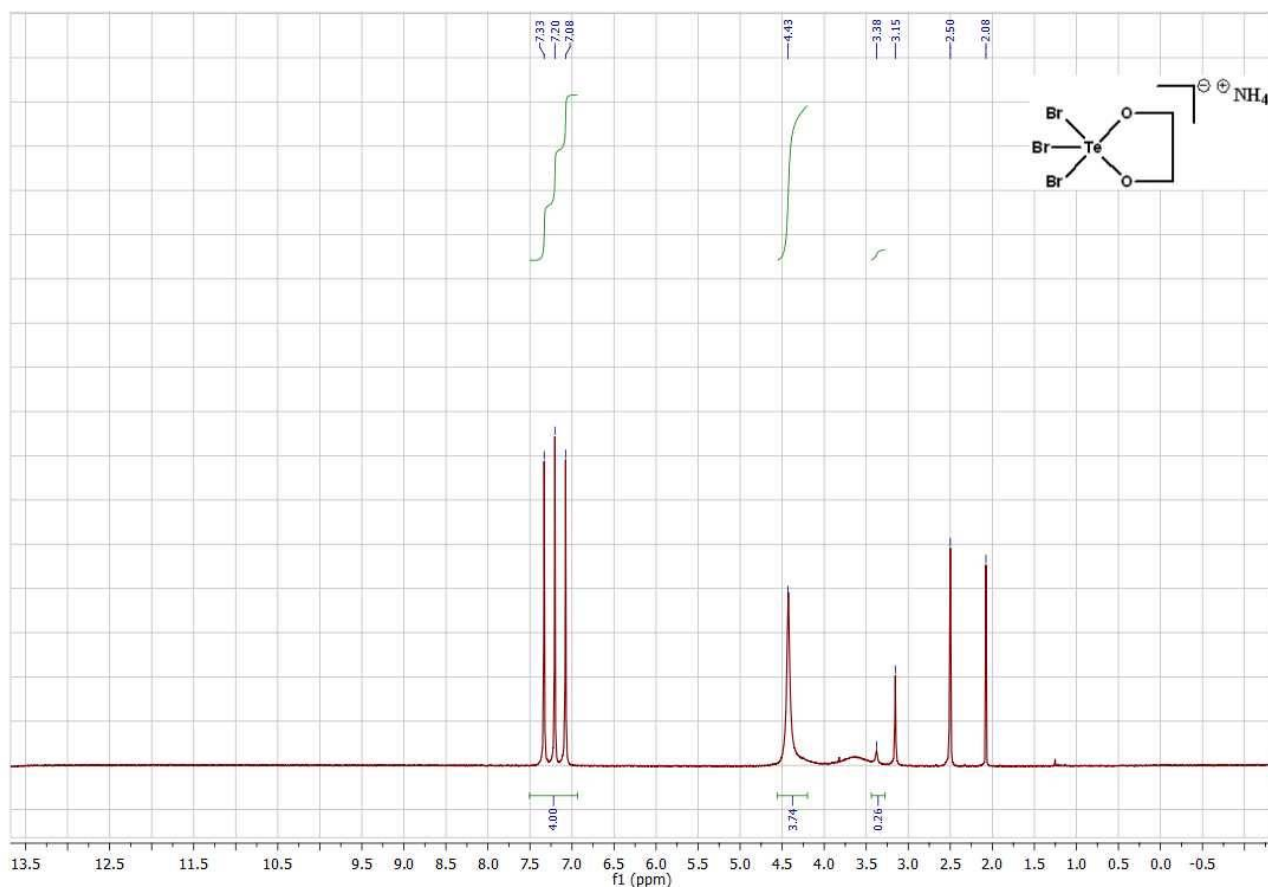

**Figure S3.**  $^1\text{H}$ NMR (400 MHz; DMSO- $d_6$ )  $\delta$ : 7.20 (4H;  $\text{NH}_4^+$ ); 4.43 (s; 4H;  $\text{CH}_2$ , coordinated ethylene glycol). 3.63 (br,  $\text{H}_2\text{O}$ ); 3.37 (s,  $\text{CH}_2$ ; free ethylene glycol, due to partial degradation of complex owing to water in the organic solvent); 3.15 (methanol; reaction solvent residual); 2.08 (acetone, residual peak of solvent).

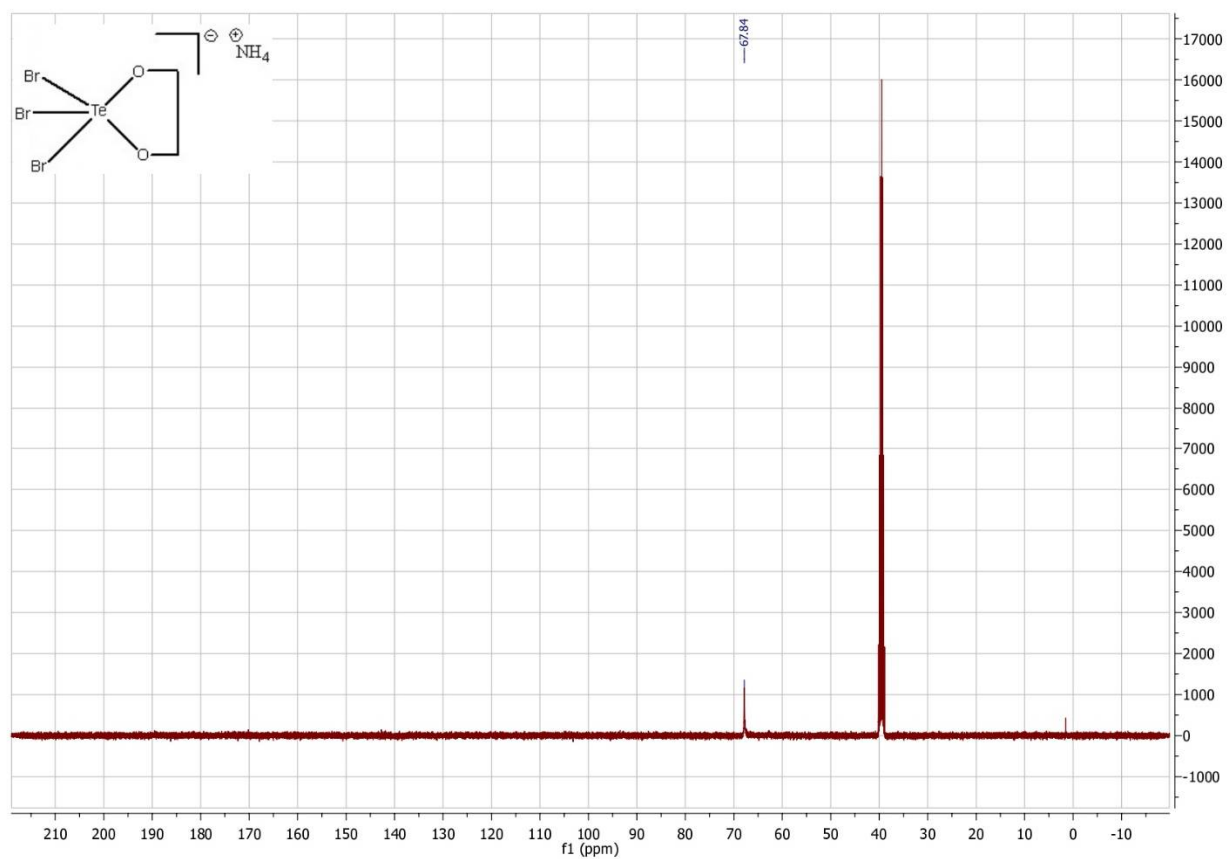

**Figure S4.**  $^{13}\text{C}\{^1\text{H}\}$  NMR (100 MHz;  $\text{DMSO-d}_6$ )  $\delta$ : 67.84 ( $\text{CH}_2$ ).

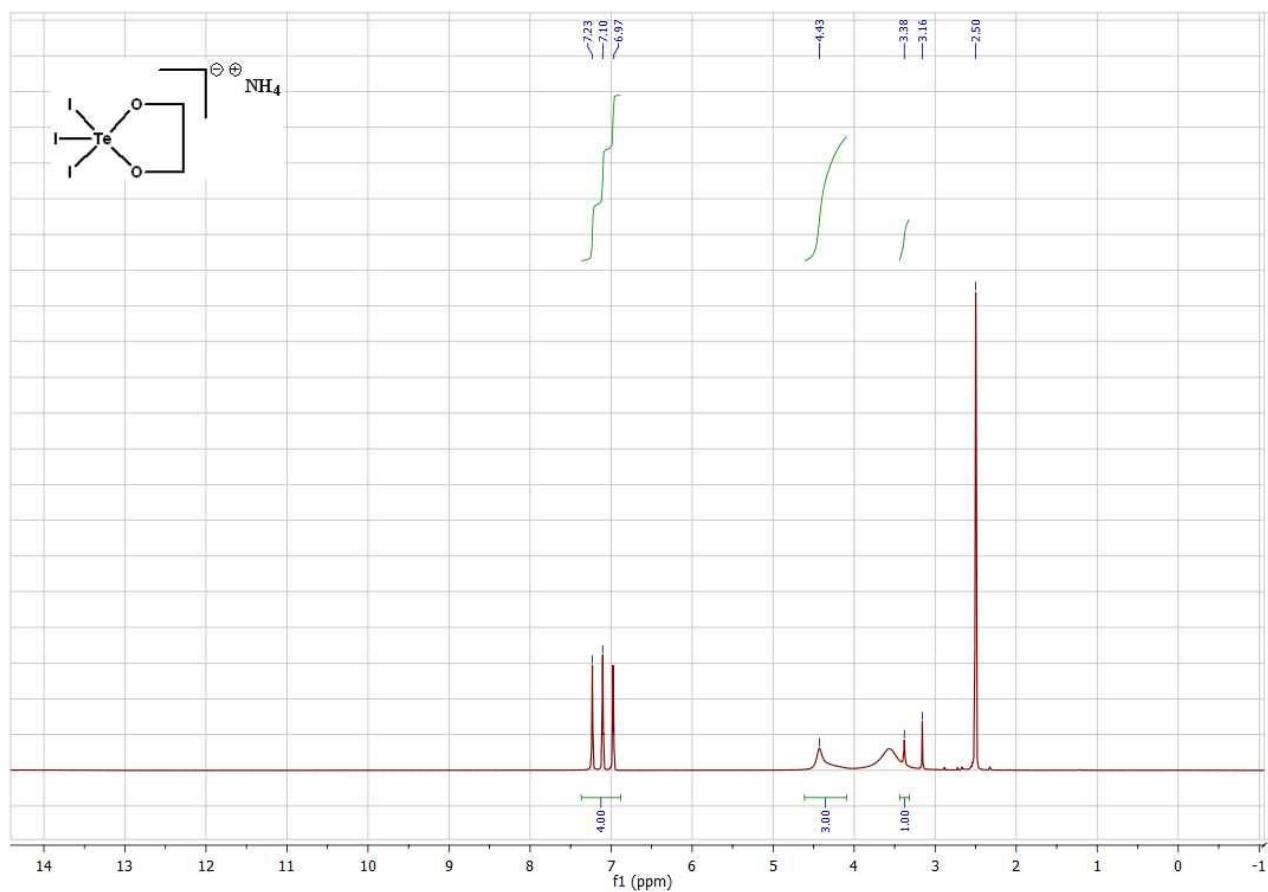

**Figure S5.**  $^1\text{H}$ NMR (400 MHz;  $\text{DMSO-d}_6$ )  $\delta$ : 7.10 (4H;  $\text{NH}_4^+$ ); 4.43 (s; 4H;  $\text{CH}_2$ , coordinated ethylene glycol). 3.59 (br,  $\text{H}_2\text{O}$ ); 3.38 (s;  $\text{CH}_2$ ; free ethylene glycol, due to partial degradation of complex owing to water in the organic solvent); 3.16 (methanol; reaction solvent residual).

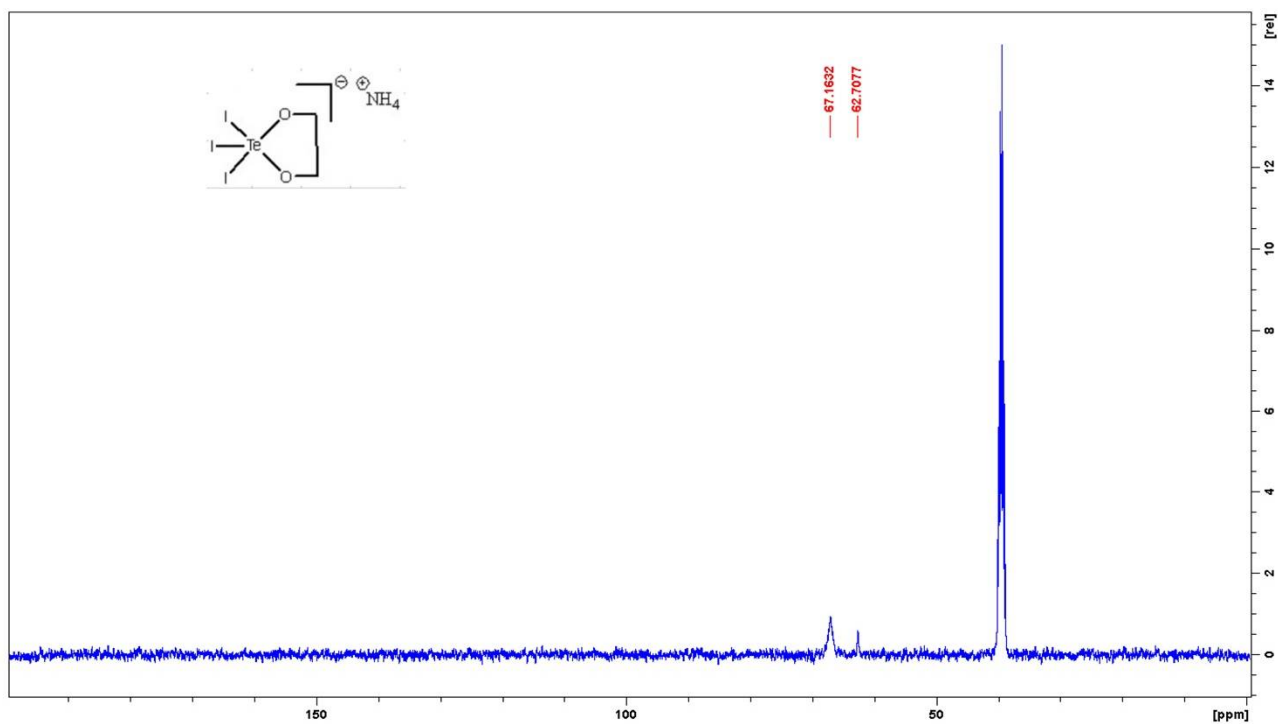

**Figure S6.**  $^{13}\text{C}\{^1\text{H}\}$  NMR (100 MHz; DMSO- $\text{d}_6$ )  $\delta$ : 67.16 ( $\text{CH}_2$ ). The signal at 62.70 is attributable to the free ethylene glycol due to partial degradation of complex owing to water in the organic solvent.

### IR spectra

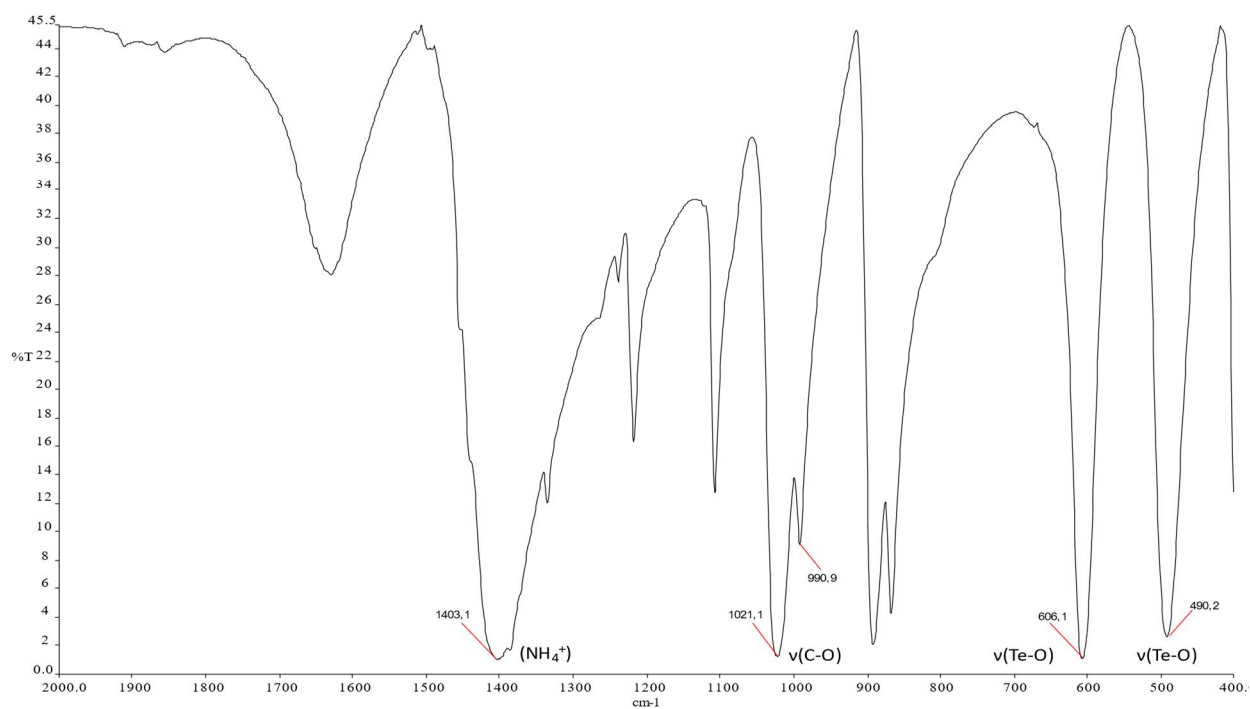

**Figure S7.** FT-IR spectrum of Ammonium Trichloro(dioxoethylene-O,O')Tellurate (AS101).

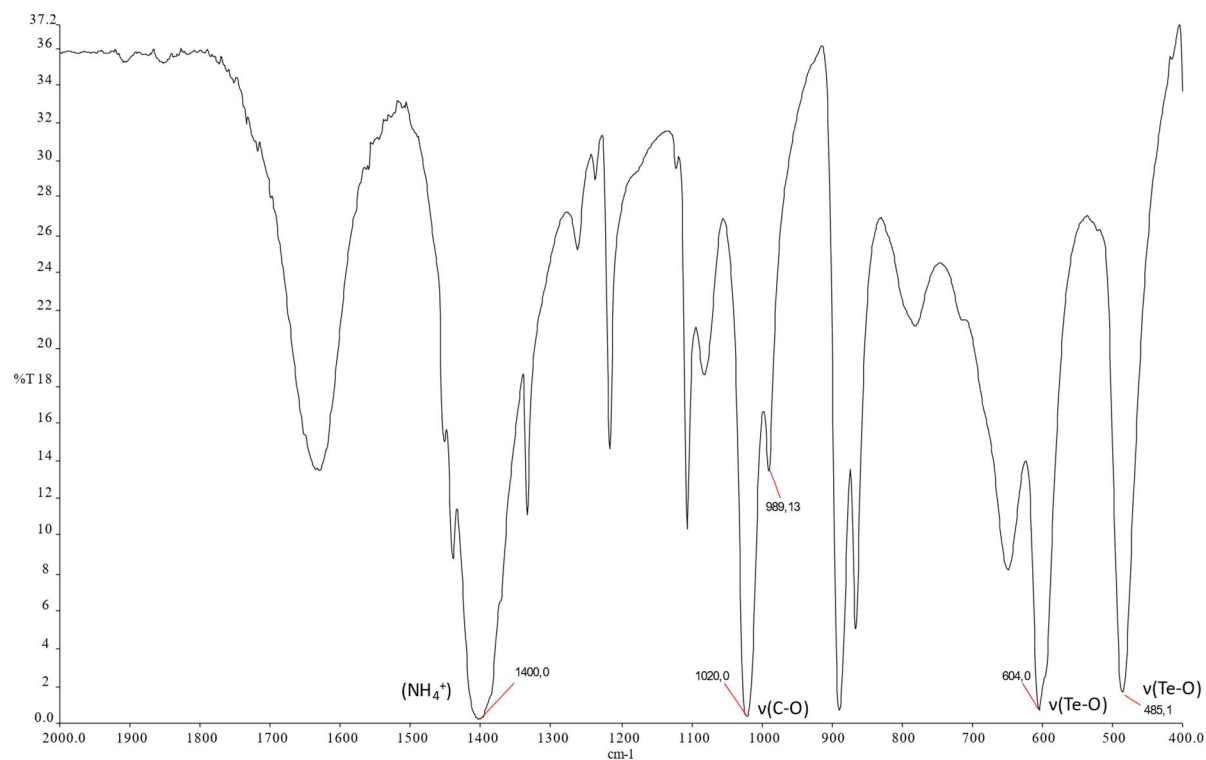

**Figure S8.** FT-IR spectrum of Ammonium Tribromo(dioxoethylene-O,O')Tellurate.

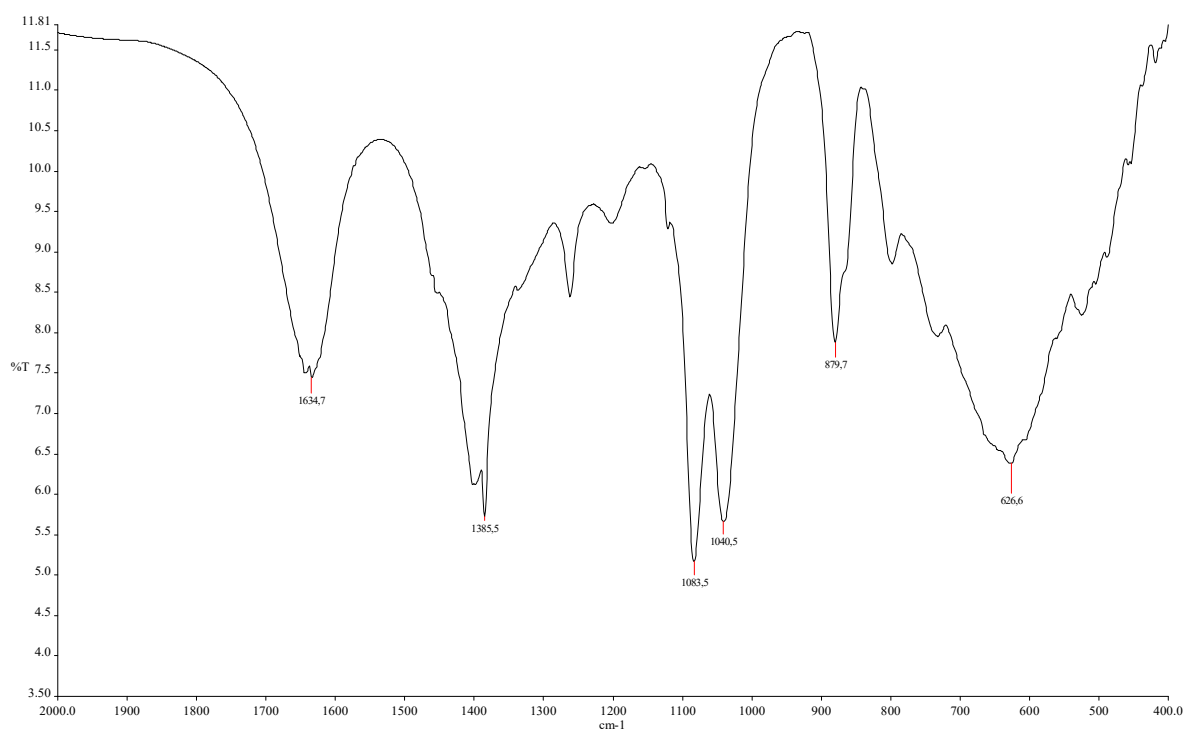

**Figure S9.** FT-IR spectrum of Ammonium Triiodo(dioxoethylene-O,O')Tellurate. The compound hydrolyzes on KBr tablet to the respective activate form (NH<sub>4</sub>TeOI<sub>3</sub>).



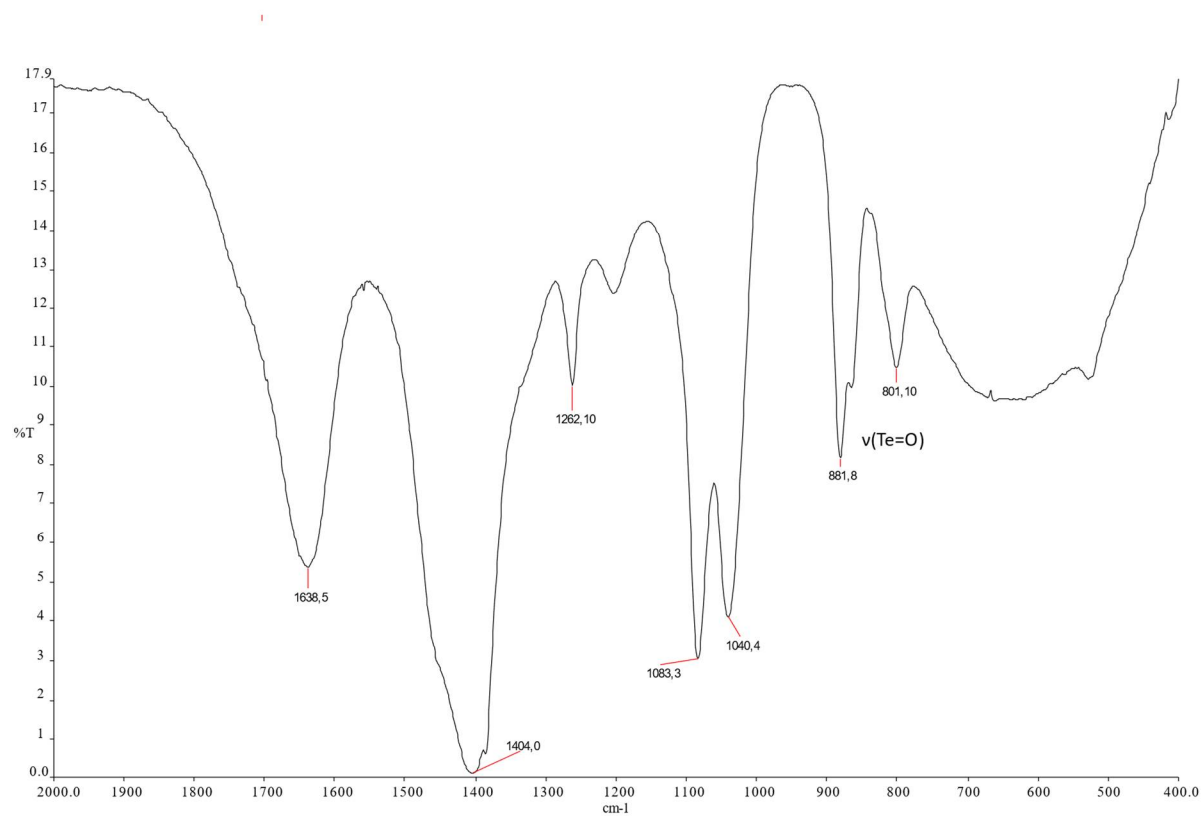

**Figure S10.** FT-IR spectrum of  $\text{NH}_4\text{TeOCl}_3$ .

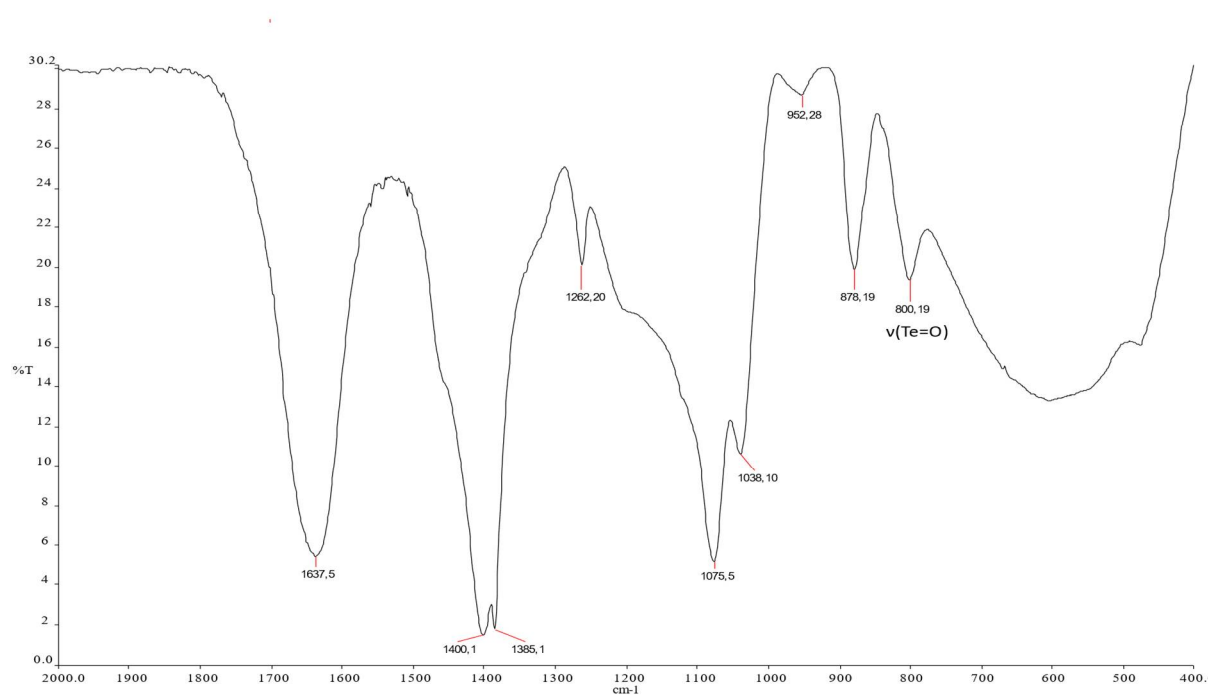

**Figure S11.** FT-IR spectrum of  $\text{NH}_4\text{TeOBr}_3$ .

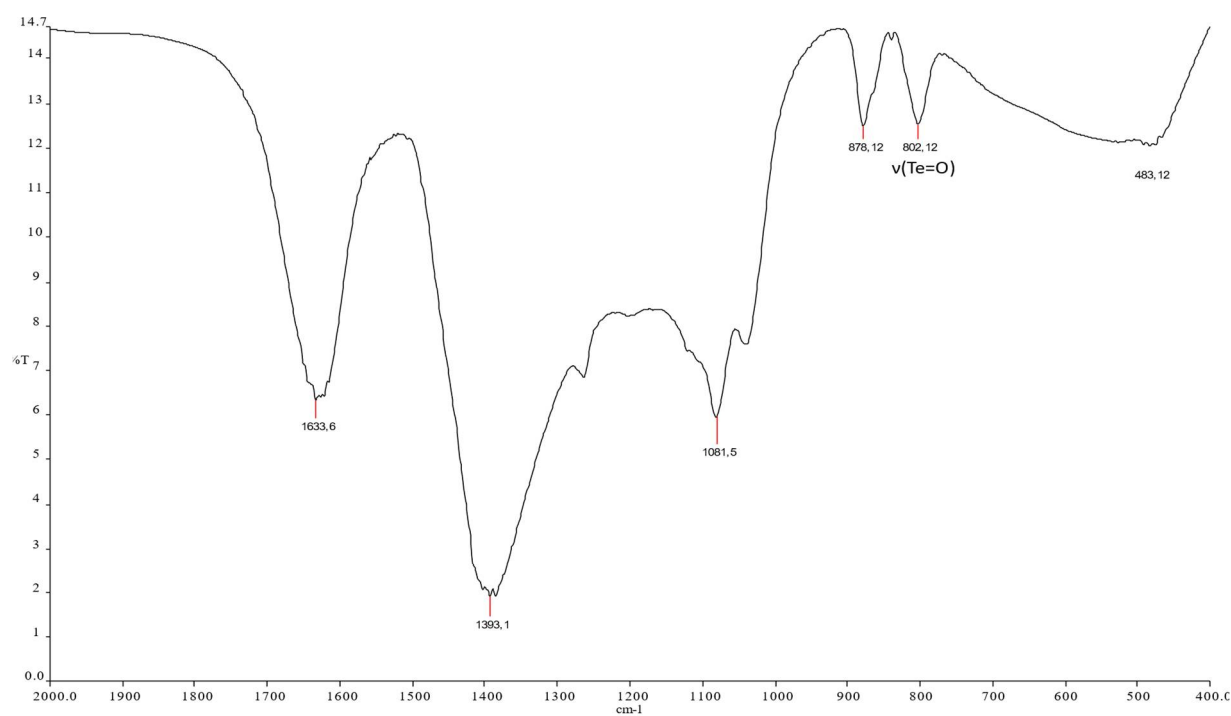

**Figure S12.** FT-IR spectrum of  $\text{NH}_4\text{TeOI}_3$

## Isolation of the oxidized species

Before IR analysis, the oxidized species were obtained using the same procedure.

To a small quantity (ca. 60 mg) of the selected tellurium compound, 4 mL of deionized water were added. The mixture was magnetically stirred for 2 h at room temperature and then filtered. The resulting solution was evaporated under reduced pressure and the solid obtained dried under vacuum for several hours.

## Computational studies

The molar excess of water with respect to the substrate was also taken into account as follows. Let us assume the second-order rate equation:

$$v = k[\text{H}_2\text{O}][\text{substrate}]$$

By assuming a water excess of:

$$[\text{H}_2\text{O}] = 20 \times [\text{substrate}]$$

The equation rate can be rewritten:

$$v = 20k[\text{substrate}]^2 = k'[\text{substrate}]^2$$

Thus, being the  $k'$  constant corresponding to  $20k$ , the related activation barrier, i.e. corrected by the water excess, can be calculated by applying the Eyring equation for the uncorrected (i.e. 1:1 water:substrate molar ratio):

$$\ln(k) = -\frac{\Delta G(\text{uncorrected})^\ddagger}{RT} + \ln\left(\frac{k_B T}{h}\right)$$

And 20:1 water substrate molar ratio:

$$\ln(20k) = -\frac{\Delta G(\text{corrected})^\ddagger}{RT} + \ln\left(\frac{k_B T}{h}\right)$$

$$\ln(20) + \ln(k) = -\frac{\Delta G(\text{corrected})^\ddagger}{RT} + \ln\left(\frac{k_B T}{h}\right)$$

By comparing the above equations, one obtains:

$$\ln(20) + -\frac{\Delta G(\text{uncorrected})^\ddagger}{RT} + \ln\left(\frac{k_B T}{h}\right) = -\frac{\Delta G(\text{corrected})^\ddagger}{RT} + \ln\left(\frac{k_B T}{h}\right)$$

And by simplifying the last expression, it is finally obtained:

$$\Delta G(\text{corrected})^\ddagger = \Delta G(\text{uncorrected})^\ddagger - RT\ln(20)$$

**Table S1.** The reaction free energy (kcal/mol) and activation barriers (corrected/uncorrected) for the three-step hydrolysis of AS101 (Cl) and its Br and I derivatives. Format: “computed value corrected for water in excess (20-fold excess) / uncorrected value”.

|       | Barrier for         | Cl        | Br        | I         |
|-------|---------------------|-----------|-----------|-----------|
| R->P  |                     | 13.0      | 9.9       | 9.4       |
| R->TS | attack of 1st water | 20.5/22.2 | 16.0/17.7 | 15.6/17.3 |
|       | attack of 2nd water | 19.7/21.4 | 12.9/14.6 | 12.2/13.9 |
|       | detachment of water | 17.0/18.7 | 12.0/13.7 | 12.7/14.4 |

## Biological studies

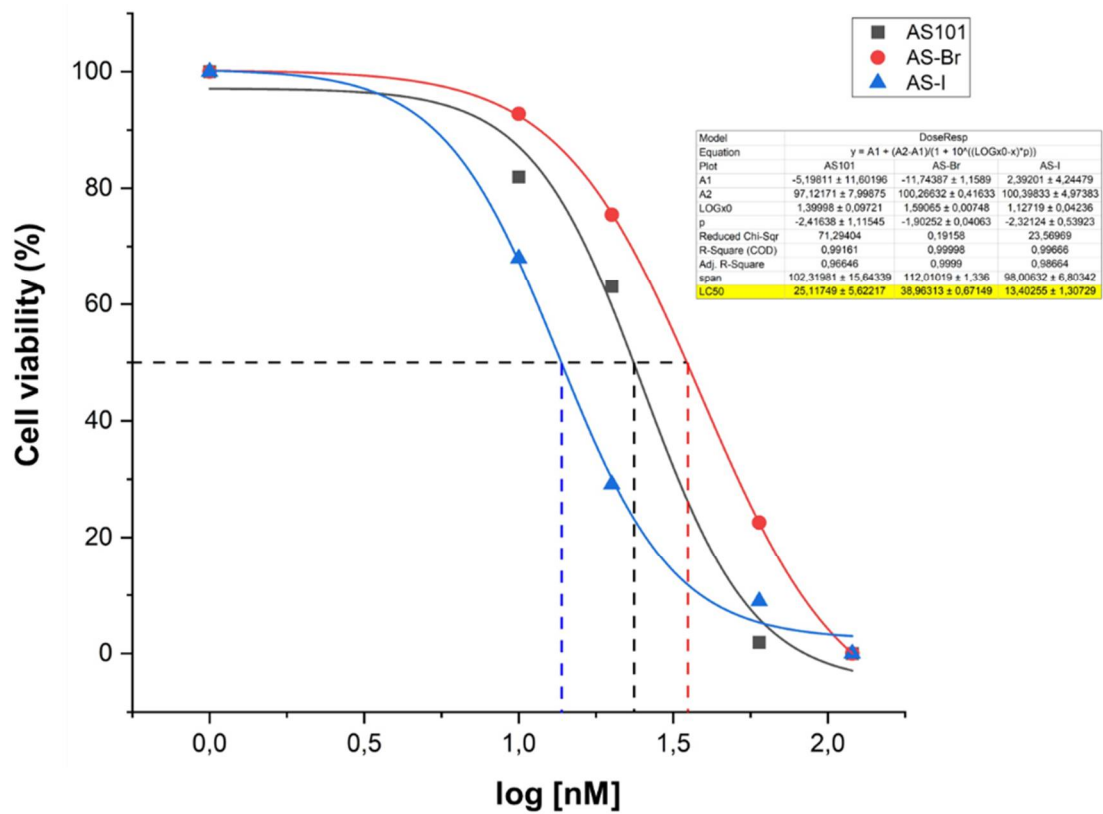

**LC<sub>50</sub> determination.** LC<sub>50</sub> was analyzed by CellTiter 96 Aqueous – One solution Reagent. Cells were treated for 24h with compound at various concentration (1-10-20-60-120nM). Values in the graph indicate the Cell Viability as the mean ± SE obtained from a n=3 of independent experiments; Statistics: One-way Anova test followed by Levene's post-test.
